# CORRECTION

## Correction: Biting Midges (Diptera: Ceratopogonidae) from Cambay Amber Indicate that the Eocene Fauna of the Indian Subcontinent Was Not Isolated

The *PLOS ONE* Staff

There is an error in the penultimate sentence of the first paragraph of the Materials and Methods. The correct sentence is: All specimens will be deposited in the collection of the Birbal Sahni Institute of Palaeosciences, Lucknow, India

A portion of the figure legend for [Fig 9](#) is incorrectly displayed in the fifth paragraph under the subheading “Biogeography” in the Discussion section. The publisher apologizes for the error. Please see the complete, correct [Fig 9](#) caption [here](#).

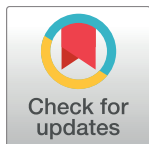

## OPEN ACCESS

**Citation:** The *PLOS ONE* Staff (2017) Correction: Biting Midges (Diptera: Ceratopogonidae) from Cambay Amber Indicate that the Eocene Fauna of the Indian Subcontinent Was Not Isolated. *PLoS ONE* 12(3): e0173135. <https://doi.org/10.1371/journal.pone.0173135>

**Published:** March 29, 2017

**Copyright:** © 2017 The PLOS ONE Staff. This is an open access article distributed under the terms of the [Creative Commons Attribution License](#), which permits unrestricted use, distribution, and reproduction in any medium, provided the original author and source are credited.

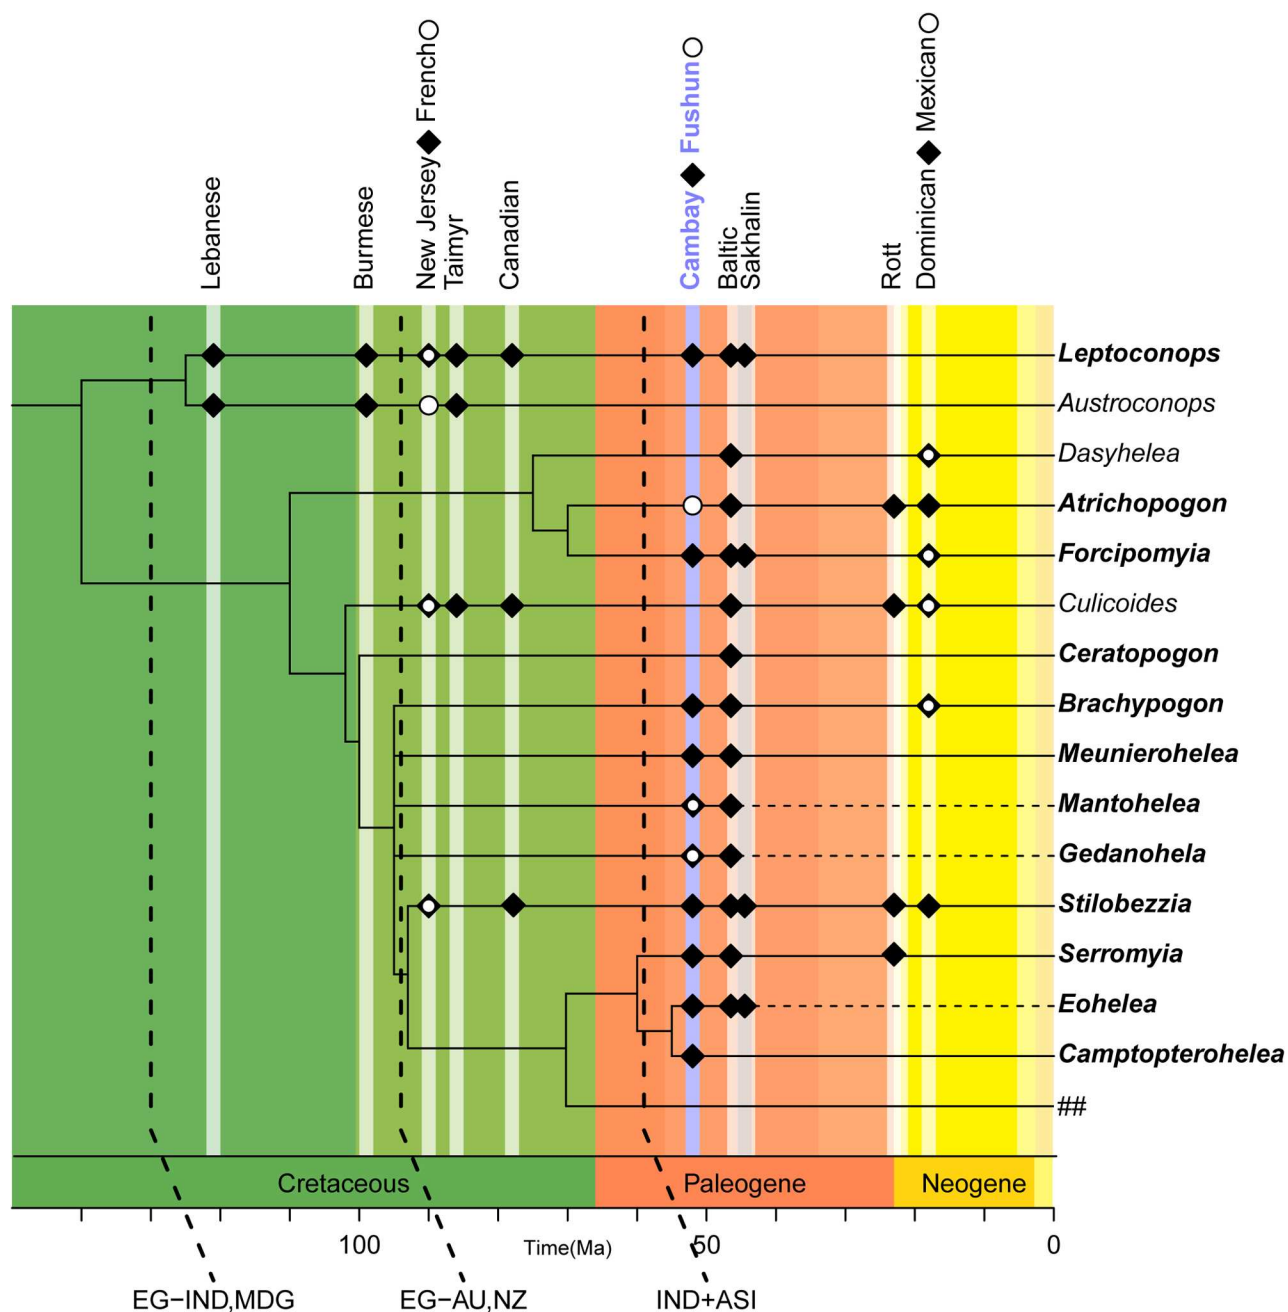

**Fig 9. Relationships of select extant and fossil Ceratopogonidae genera (compiled from data after [28, 59, 60, 63]).** Dashed lines in the cladogram refer to extinct taxa, solid lines to extant taxa. ## refers to genera in tribes different than Ceratopogonini (Heteromyiini, Hebetulini, Johannsenomyiini, Sphaeromyiini, Palpomyiini and Stenoxenini). Explanations: EG-IND, MDG = beginning of separation of India (IND) and Madagascar (MDG) from East Gondwanaland (EG) (after [64]); EG-AU, NZ = beginning of separation of Australia (AU) and New Zealand (NZ) from East Gondwana (after [64]); IND+ASI = collision of India with Asia (after [65]).

<https://doi.org/10.1371/journal.pone.0173135.g001>

## Reference

1. Stebner F, Szadziewski R, Singh H, Gunkel S, Rust J (2017) Biting Midges (Diptera: Ceratopogonidae) from Cambay Amber Indicate that the Eocene Fauna of the Indian Subcontinent Was Not Isolated. PLoS ONE 12(1): e0169144. doi:10.1371/journal.pone.0169144 PMID: 28076427
